# Supplementary material for: RETRACTED ARTICLE:Identification of the cathelicidin peptide LL-37 as agonist for the type I insulin-like growth factor receptor
Source: PubMed Central journal article supplement — Oncogene. 2011 Jun 20;31(3):352–65. doi: 10.1038/onc.2011.239 (PMC3262900; doi:10.1038/onc.2011.239), 2011-06-20
Supplement: 41388_2012_BFonc2011239_MOESM18_ESM.pdf [file 41388_2012_BFonc2011239_MOESM18_ESM.pdf]

## Supplementary Figure 1

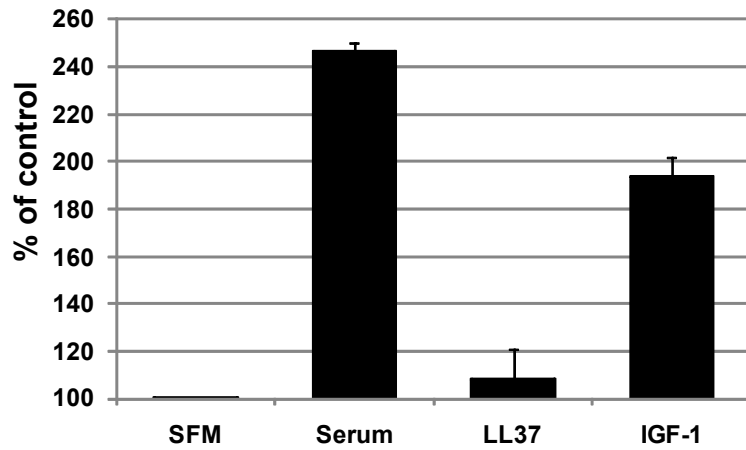

### Figure legend

Effects of LL-37 on cell proliferation.

MCF-7 cells were serum starved overnight and then stimulated with LL-37, IGF-1 or 10% serum or maintained in serum free media (SFM) for 48 h. Cell proliferation was evaluated by colorimetric a assay (XTT). The cell density at start of the experiments was in all experiments 25,000 cells/well. The values represent means of three experiments; bars,  $\pm$ SE.
