# Supplementary material for: RETRACTED ARTICLE:Identification of the cathelicidin peptide LL-37 as agonist for the type I insulin-like growth factor receptor
Source: PubMed Central journal article supplement — Oncogene. 2011 Jun 20;31(3):352–65. doi: 10.1038/onc.2011.239 (PMC3262900; doi:10.1038/onc.2011.239), 2011-06-20
Supplement: 41388_2012_BFonc2011239_MOESM19_ESM.pdf [file 41388_2012_BFonc2011239_MOESM19_ESM.pdf]

Supplementary Fig. 2

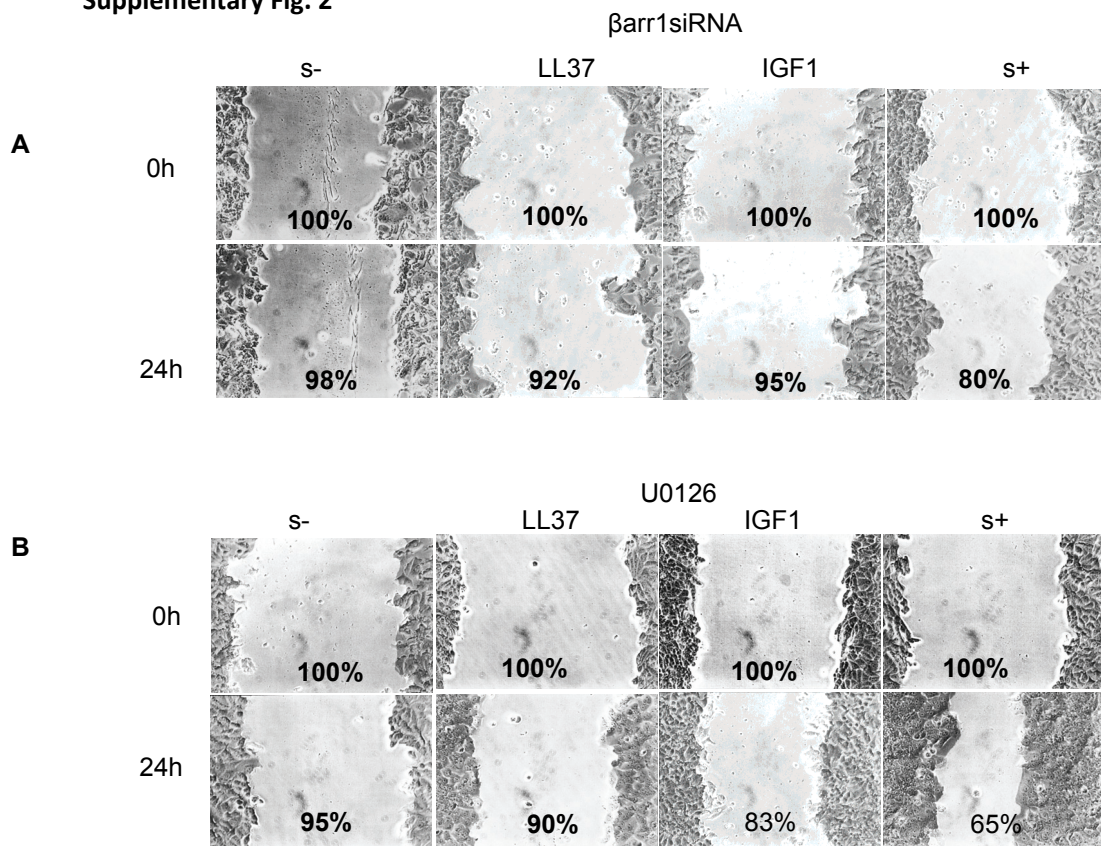

Figure legend

Effects of LL-37 on wound healing.

MCF 7 cells were transfected with  $\beta$ -arrestin1 siRNA for 48 hours (A) or untransfected (B). Confluent cells were serum-starved overnight. An artificial wound was made in the cell monolayer with a micropipette tip. After wounding, the cells were grown with IGF-1 (50 ng/ml), LL-37 (9  $\mu$ g/ml) or 10% serum for 24 hours in the absence (A) or presence (B) of MEK inhibitor (U0126). Wound closure was photographed and quantified by image analysis software and the efficiency of wound healing was calculated as percentage compared to starting point.
